# Supplementary material
Source: PubMed Central journal article supplement (PMC4470377)
Supplement: NIHMS698871-supplement-eFigures_1___2.pdf [file NIHMS698871-supplement-eFigures_1___2.pdf]

## Supplementary Online Content

Peterson C, Ailes E, Riehle-Colarusso T, et al. Late detection of critical congenital heart disease among US infants: estimation of the potential impact of proposed universal screening using pulse oximetry. *JAMA Pediatr*. Published online February 3, 2014.  
doi:10.1001/jamapediatrics.2013.4779

**eFigure 1.** Frequency of late detection among 3746 infants by critical congenital heart disease (CCHD) type and presence of extracardiac defects. From the National Birth Defects Prevention Study, 1998-2007

**eFigure 2.** Frequency of late detection among infants by critical congenital heart disease (CCHD) type and study site, for defects with >10 infants per study site. From the National Birth Defects Prevention Study, 1998-2007

This supplementary material has been provided by the authors to give readers additional information about their work.

**eFigure 1. Frequency of late detection among 3746 infants by critical congenital heart disease (CCHD) type and presence of extracardiac defects. From the National Birth Defects Prevention Study, 1998-2007**

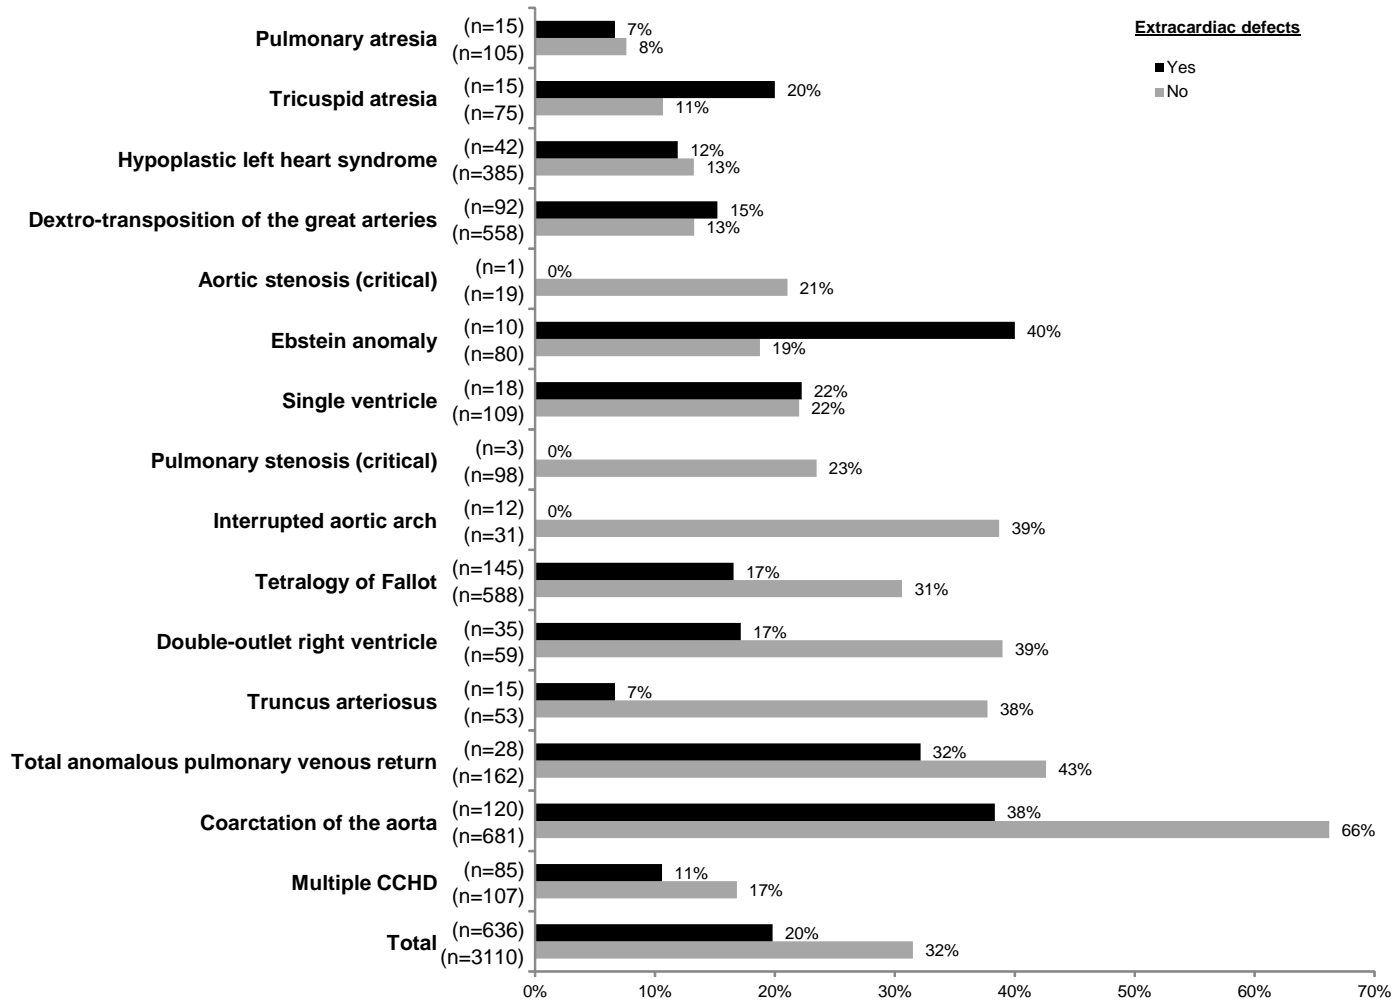

Note: Multiple CCHD refers to more than one screening-detectable CCHD.

© 2014 American Medical Association. All rights reserved.

**eFigure 2. Frequency of late detection among infants by critical congenital heart disease (CCHD) type and study site, for defects with >10 infants per study site. From the National Birth Defects Prevention Study, 1998-2007**

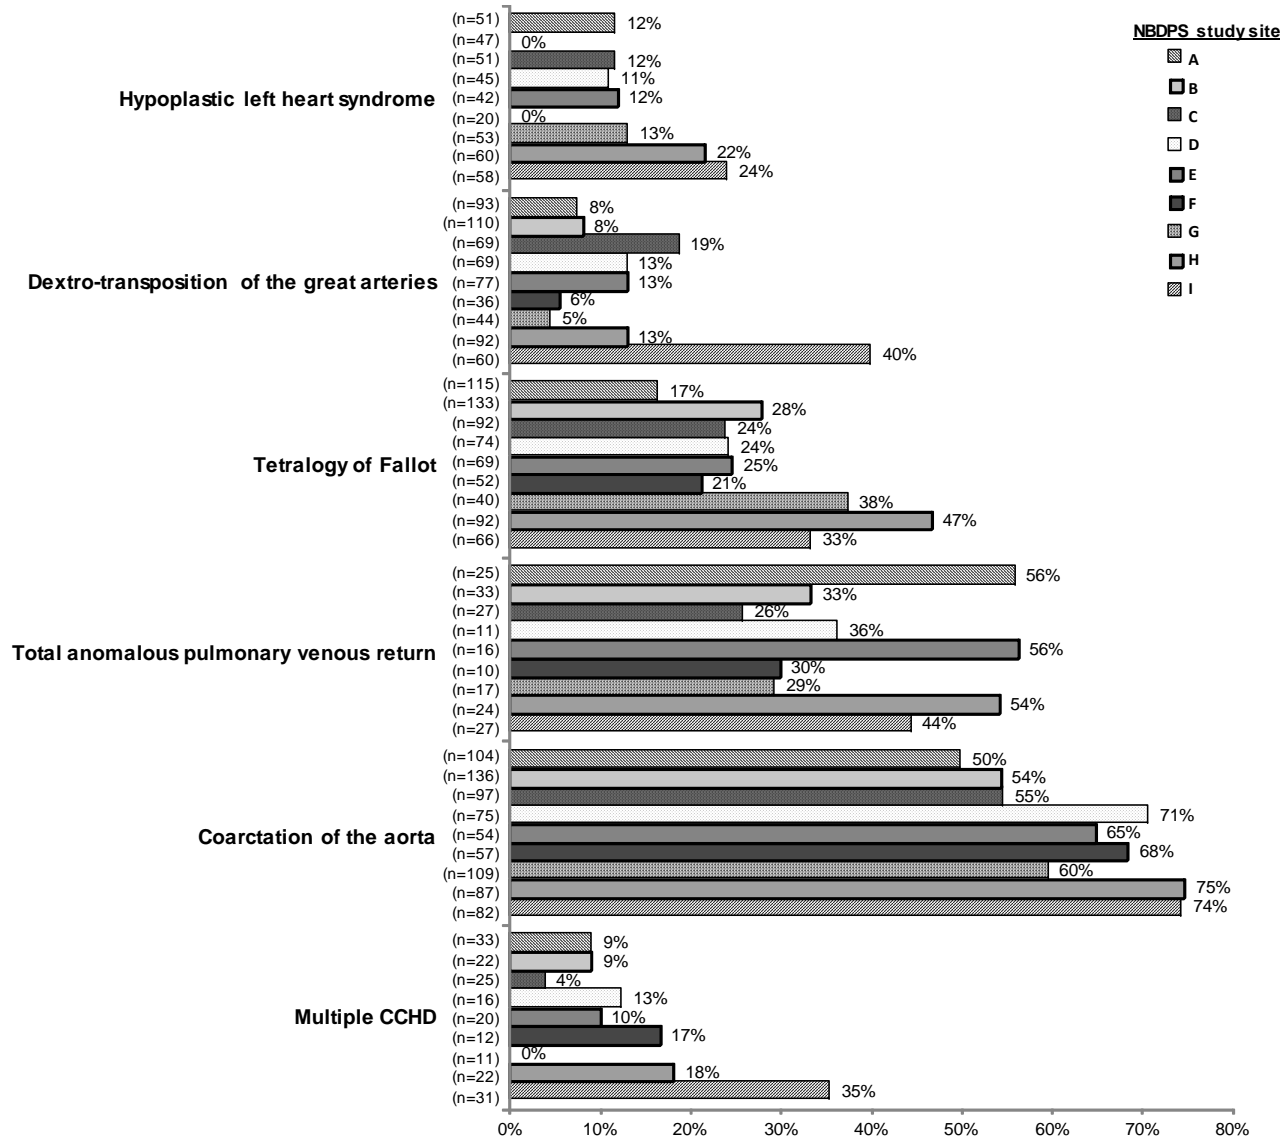

Note: Multiple CCHD refers to more than one screening-detectable CCHD.

© 2014 American Medical Association. All rights reserved.
